# Supplementary material for: Efficacy and safety of IL inhibitors, TNF-α inhibitors, and JAK inhibitors in patients with ankylosing spondylitis: a systematic review and Bayesian network meta-analysis
Source: PubMed Central journal article supplement — Ann Transl Med. 2023 Feb 28;11(4):178. doi: 10.21037/atm-23-195 (PMC10009571; doi:10.21037/atm-23-195), 2023-02-28
Supplement: atm-11-04-178-supplementary.pdf [file atm-11-04-178-supplementary.pdf]

Table S1 Search strategy

| English Literature |                                                                                                                                                                                                                                                                                                                                                                                  |
|--------------------|----------------------------------------------------------------------------------------------------------------------------------------------------------------------------------------------------------------------------------------------------------------------------------------------------------------------------------------------------------------------------------|
| No.                | Query                                                                                                                                                                                                                                                                                                                                                                            |
| 1.                 | "Spondylitis, Ankylosing"(Mesh)                                                                                                                                                                                                                                                                                                                                                  |
| 2.                 | ((Spondylitis, Ankylosing(Title/Abstract)) OR (Ankylosing Spondylitis(Title/Abstract))) OR (bekhterev*(Title/Abstract)) OR (bechterew*(Title/Abstract))                                                                                                                                                                                                                          |
| 3.                 | ankylosing AND spondyl*                                                                                                                                                                                                                                                                                                                                                          |
| 4.                 | #1 or #2 or #3                                                                                                                                                                                                                                                                                                                                                                   |
| 5.                 | (("Janus Kinase Inhibitors"(Mesh)) OR "Janus Kinase 1"(Mesh)) OR "Janus Kinase 2"(Mesh)                                                                                                                                                                                                                                                                                          |
| 6.                 | "Janus Kinase Inhibitors" OR "jak1*" OR "jak-1*" OR "jak2*" OR "jak-2*" OR "JAK Inhibitor" OR "Tofacitinib" OR "Upadacitinib" OR "Ruxolitinib" OR "Baricitinib"                                                                                                                                                                                                                  |
| 7.                 | #5 OR #6                                                                                                                                                                                                                                                                                                                                                                         |
| 8.                 | (("Tumor Necrosis Factor Inhibitors"(Mesh)) OR "Receptors, Tumor Necrosis Factor"(Mesh)) OR "Antibodies, Monoclonal"(Mesh)                                                                                                                                                                                                                                                       |
| 9.                 | "Tumor Necrosis Factor Inhibitor" OR "Tumor Necrosis Factor alpha Inhibitor" OR "TNF Inhibitor" OR "TNF-a Inhibitor" OR "TNF alpha Inhibitor" OR "anti-tumor necrosis factor" OR "Anti-TNF- $\alpha$ drugs" OR "Anti-TNF agent" OR "anti-tnf" OR "Infliximab" OR "Adalimumab" OR "Golimumab" OR "Etanercept" OR "Certolizumabpegol"                                              |
| 10.                | #8 OR #9                                                                                                                                                                                                                                                                                                                                                                         |
| 11.                | "Interleukin Inhibitors"(Mesh)                                                                                                                                                                                                                                                                                                                                                   |
| 12.                | "Interleukin Inhibitors" OR "Interleukin 17 Inhibitor" OR "Interleukin 23 Inhibitor" OR "Interleukin 6 Inhibitor" OR "IL-17 Inhibitor" OR "IL-23 Inhibitor" OR "IL-6 Inhibitor" OR "IL Inhibitor" OR "Anti-IL-17" OR "Anti-IL-23" OR "Anti-IL-6" OR "Ixekezumab" OR "Bimekezumab" OR "Netakimab" OR "Secukinumab" OR "Risankizumab"                                              |
| 13.                | #11 OR #12                                                                                                                                                                                                                                                                                                                                                                       |
| 14.                | #7 OR #10 OR #13                                                                                                                                                                                                                                                                                                                                                                 |
| 15.                | ("Controlled Clinical Trial" (Publication Type)) OR "Randomized Controlled Trial" (Publication Type)                                                                                                                                                                                                                                                                             |
| 16.                | "Randomized Controlled Trial" OR "Controlled Clinical Trial" OR "randomly" OR "trial" OR "Placebo" OR "RCT" OR "RCTs" OR "Random*"                                                                                                                                                                                                                                               |
| 17.                | #15 OR #16                                                                                                                                                                                                                                                                                                                                                                       |
| 18.                | #4 AND #14 AND #17                                                                                                                                                                                                                                                                                                                                                               |
| Chinese literature |                                                                                                                                                                                                                                                                                                                                                                                  |
| 1.                 | “强直性脊柱炎”和“Tofacitinib, Xeljanz, 托法替尼, Golimumab, 欣普尼, 戈利木单抗, Upadacitinib, Rinvoq, 瑞福, 乌帕替尼, Infliximab, Remicade, 类克, 英夫利昔单抗, Etanercept, 恩利, 依那西普, Certolizumab, Cimzia, 希敏佳, 赛妥珠单抗, 培塞利珠单抗, Adalimumab, Humira, 修美乐, 阿达木单抗, Secukinumab, Cosentyx, 可善挺, 司库奇尤单抗, 苏金单抗, Ixekezumab, Taltz, 伊西贝单抗, Bimekezumab, Bimzelx, 比美吉珠单抗, Netakimab, Risankizumab, SKYRIZI, 瑞莎珠单抗”和“随机对照” |

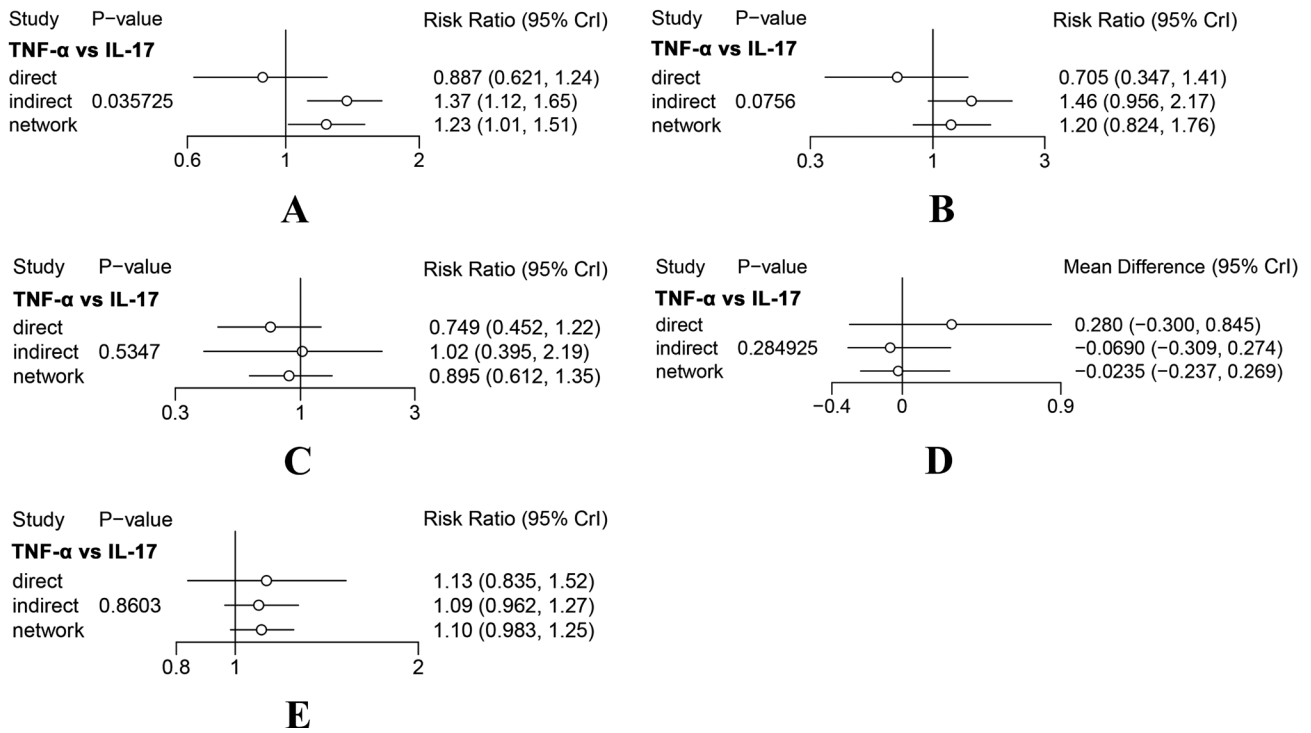

**Figure S1** The node-splitting approach. (A) ASAS20; (B) ASAS40; (C) BASDAI50; (D) BASFI;(E) AEs. AEs, adverse events.

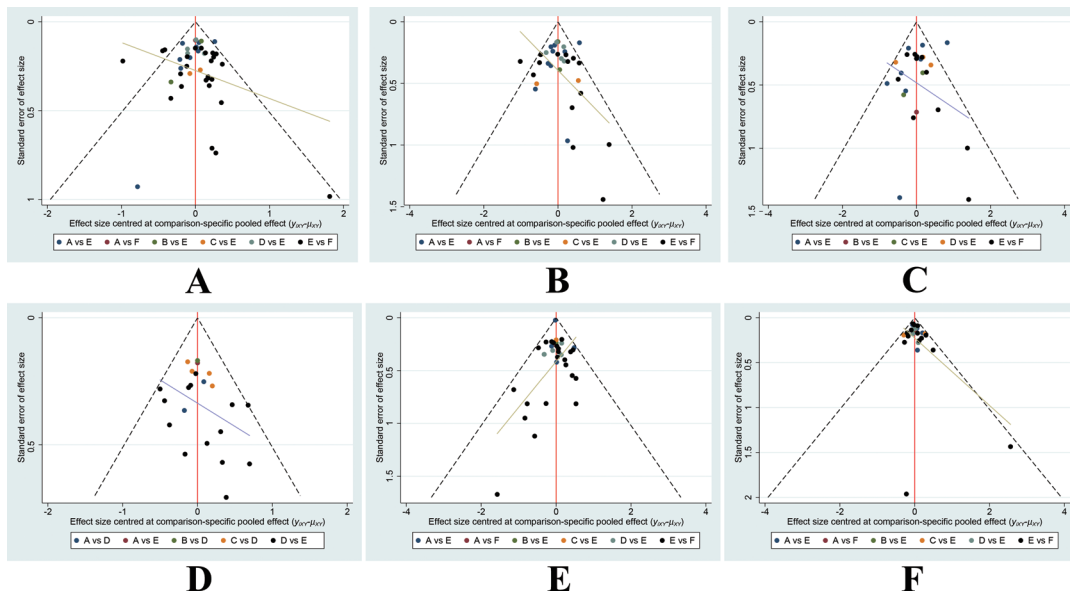

**Figure S2** The funnel plot. (A) ASAS20; (B) ASAS40; (C) ASAS5/6; (D) BASDAI50; (E) BASFI;(F) AEs. AEs, adverse events.

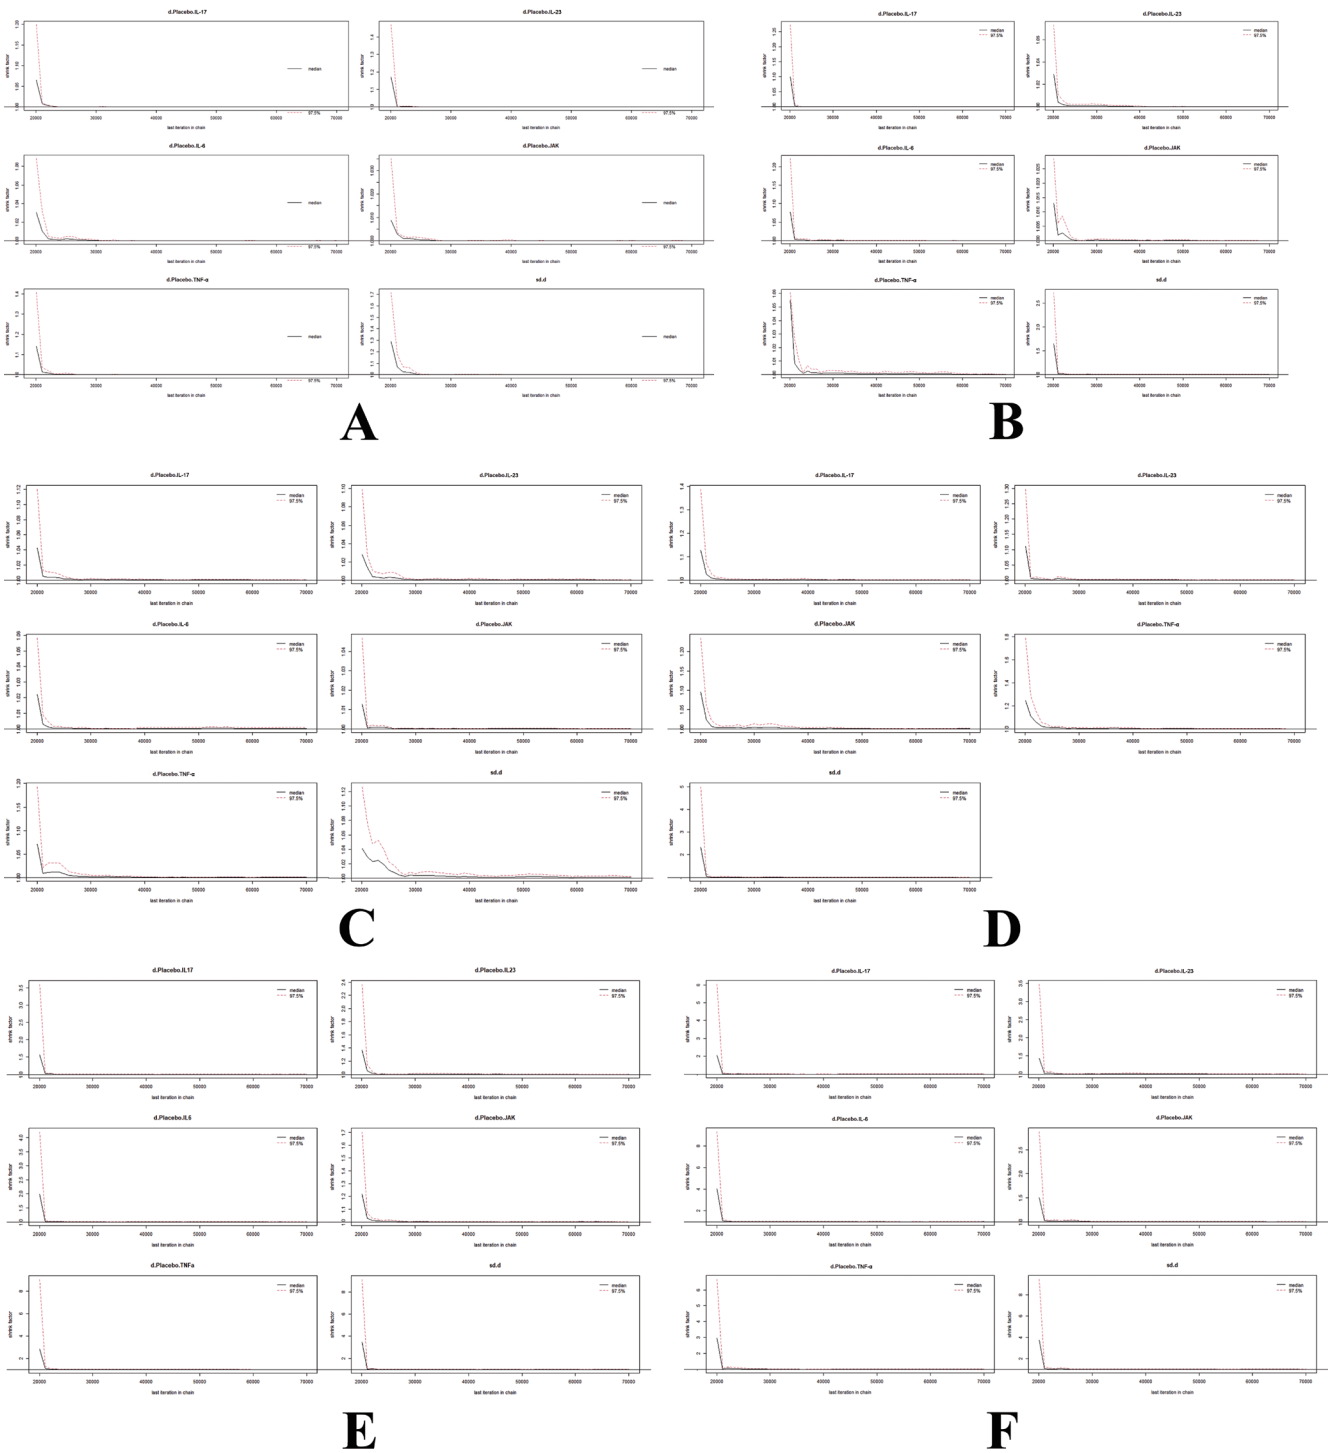

**Figure S3** The Convergence Diagnostics plot. (A) ASAS20; (B) ASAS40; (C) ASAS5/6; (D) BASDAI50; (E) BASFI;(F) AEs. AEs, adverse events.

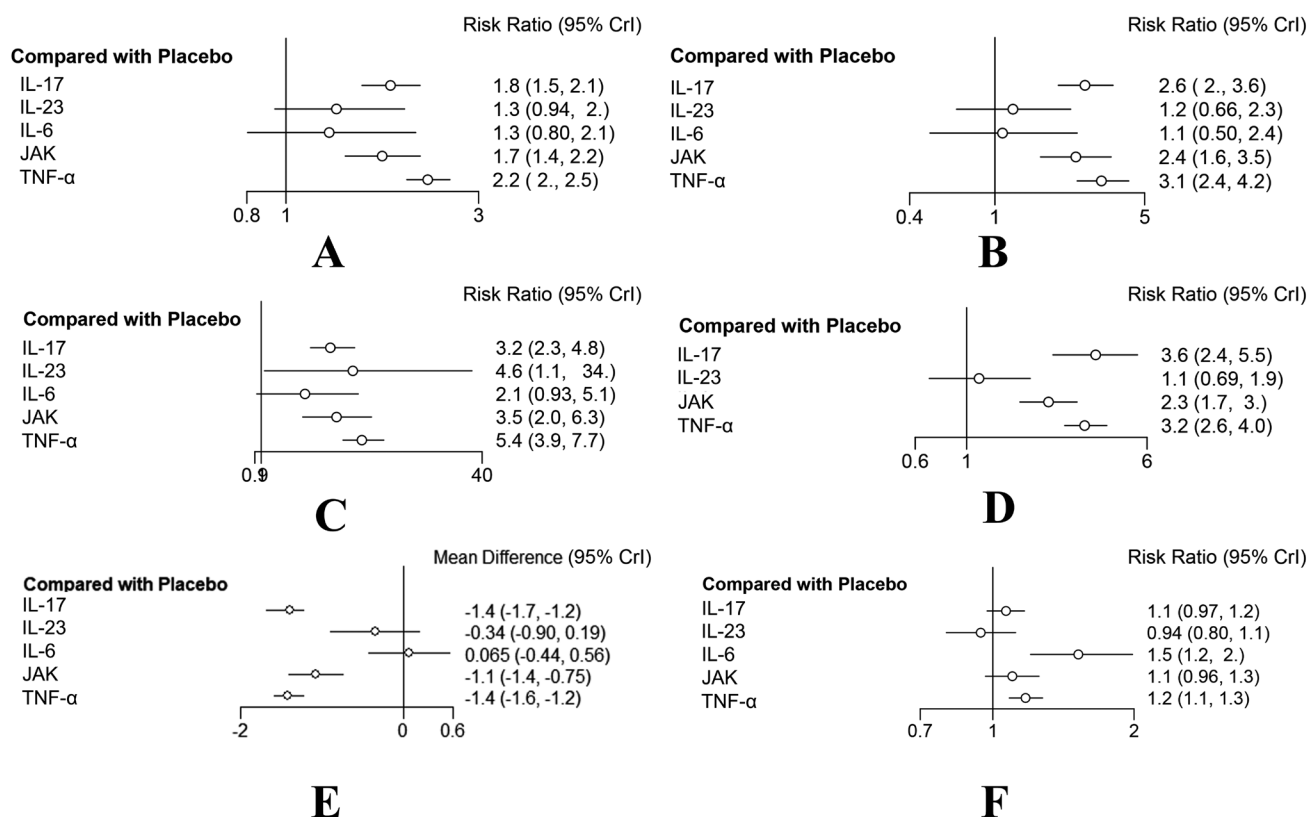

**Figure S4** The forest plot. (A) ASAS20; (B) ASAS40; (C) ASAS5/6; (D) BASDAI50; (E) BASFI; (F) AEs. AEs, adverse events.

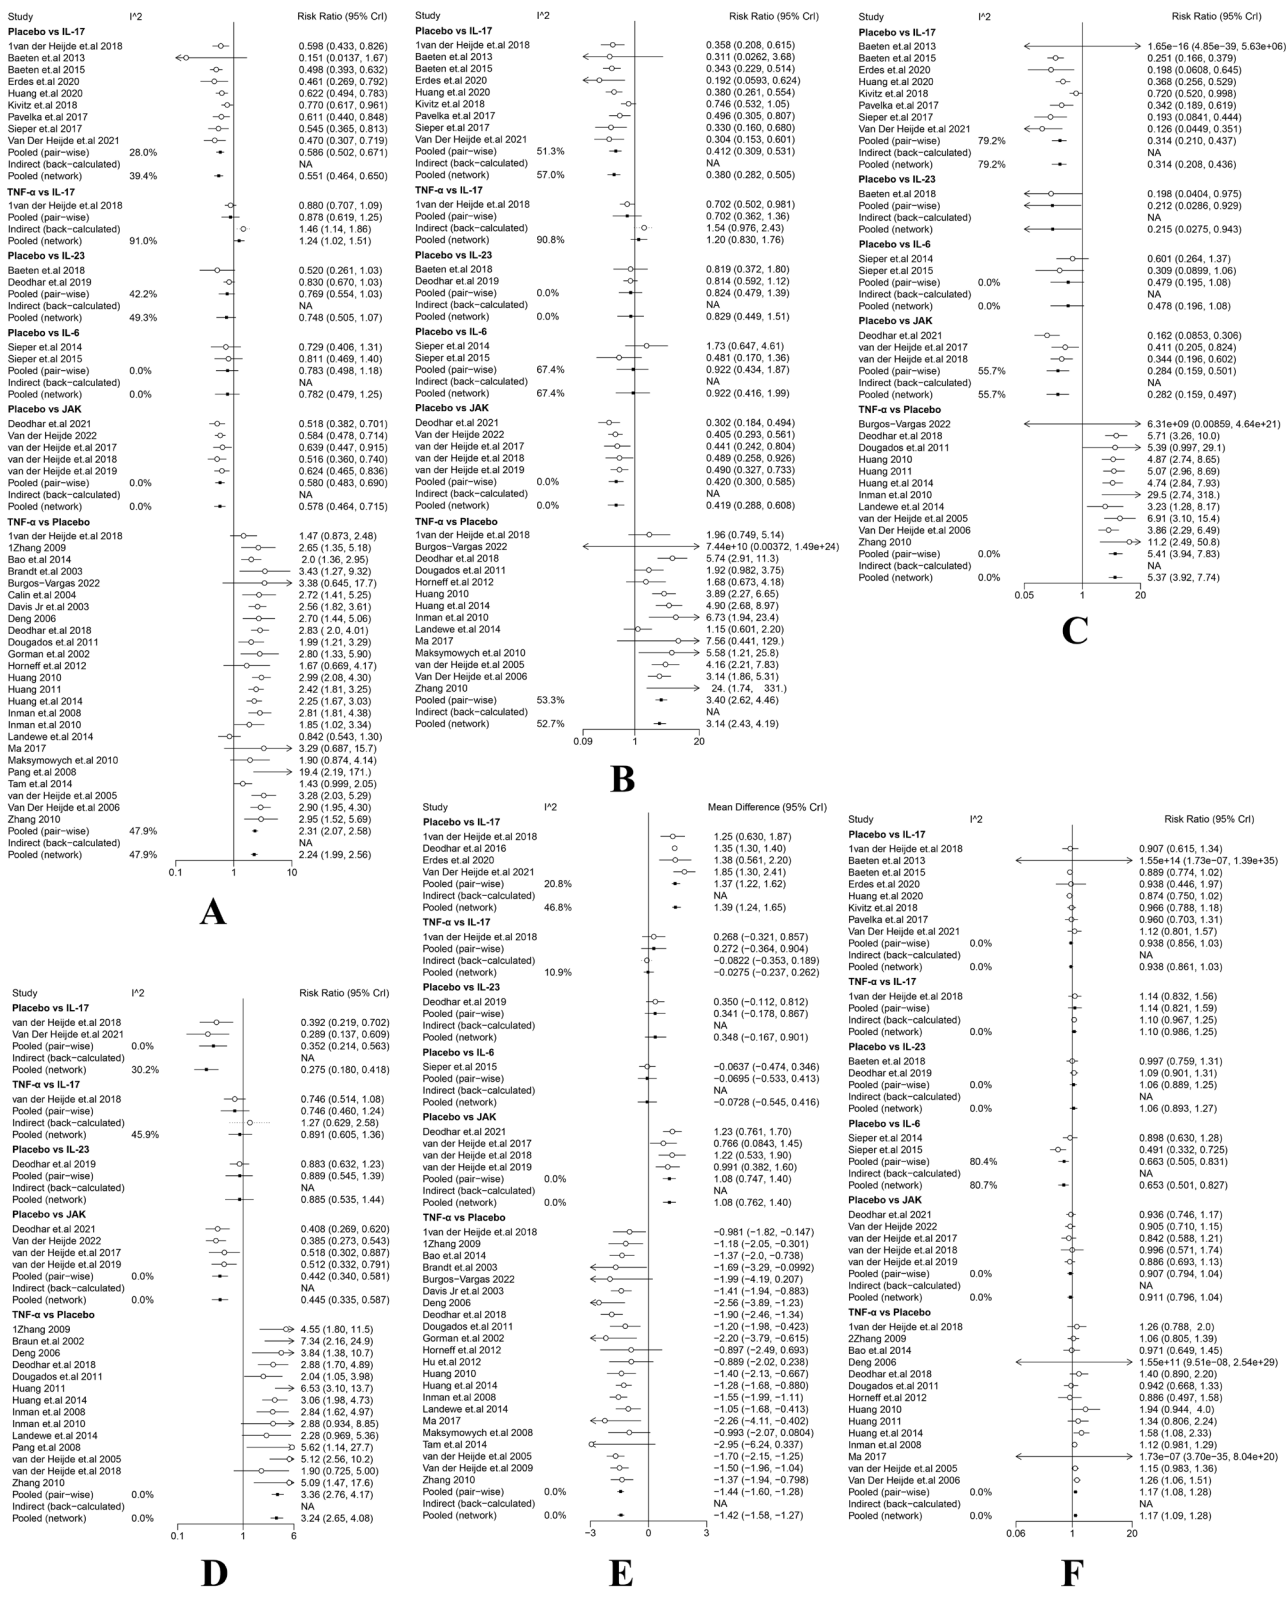

**Figure S5** The Heterogeneity Analysis Plot. (A) ASAS20; (B) ASAS40; (C) ASAS5/6; (D) BASDAI50; (E) BASFI; (F) AEs. AEs, adverse events.
